# Supplementary material for: “There Is a Cat on Our Ward”: Inpatient and Staff Member Attitudes toward and Experiences with Cats in a Psychiatric Ward
Source: Int J Environ Res Public Health. 2019 Aug 27;16(17):3108. doi: 10.3390/ijerph16173108 (PMC6747524; doi:10.3390/ijerph16173108)
Supplement: Supplementary file 1 [file ijerph-16-03108-s001.pdf]

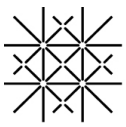

## Semi-structured Interview

### Inpatients on Wards with Cats:

Date: \_\_\_\_\_

Ward:: \_\_\_\_\_

Patientcode: \_\_\_\_\_

1. Gender:

- ☐ Male
- ☐ Female

2. How long have you been on this ward?

3. Did the hospitalization happen on your own request?

- ☐ Yes
- ☐ No

4. How often do you spend percentage-wise in the following areas during your therapy-free period? (Distribute 100% to the following three areas).

- ☐ In your room
- ☐ On the ward
- ☐ Outside the ward

5. What do you do in your spare time when you don't have therapy?

---

---

---

---

---

6. What are positive aspects of your ward?

---

---

---

---

---

7. Are you satisfied with your ward?

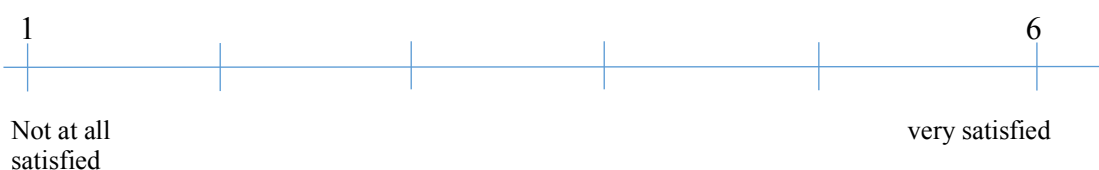

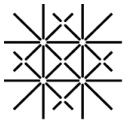

8. What is important to you regarding ward atmosphere?

---

---

---

---

9. Do you know that a cat lives on your ward?

- ☐ Yes
- ☐ No

10. How often do you see the cat?

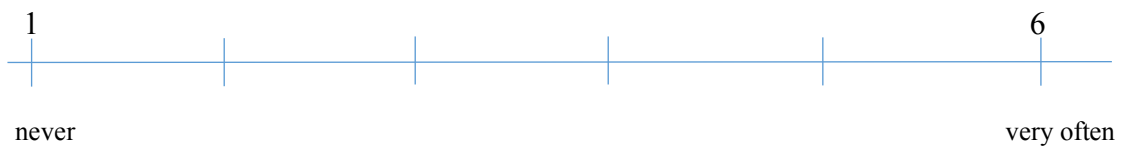

11. Is the cat trustful?

- ☐ Yes
- ☐ No

12. How close is your contact to the cat?

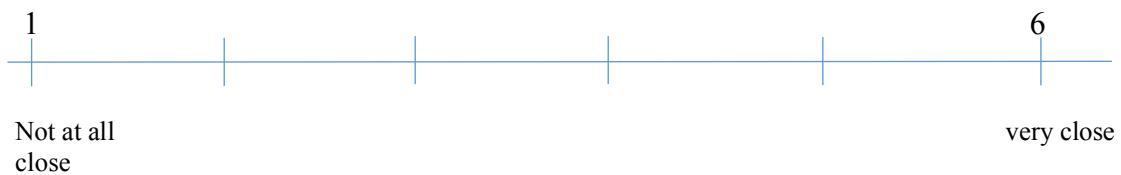

13. How is your emotional relation to the cat?

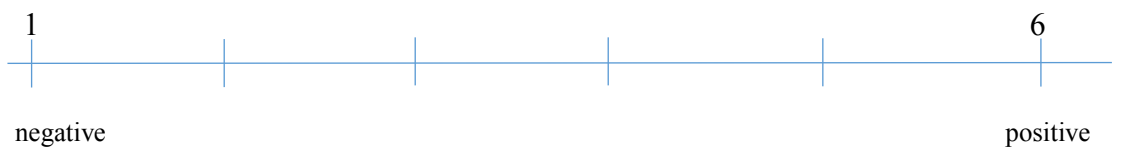

14. How much time do you spend with the cat daily?

- ☐ No time
- ☐ Up to 10 minutes
- ☐ Up to 30 minutes
- ☐ Up to 60 minutes
- ☐ More than 60 minutes

15. Do you search the ward cat actively?

- ☐ Yes
- ☐ No

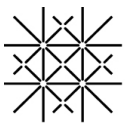

16. How do you feel about housing a ward cat?

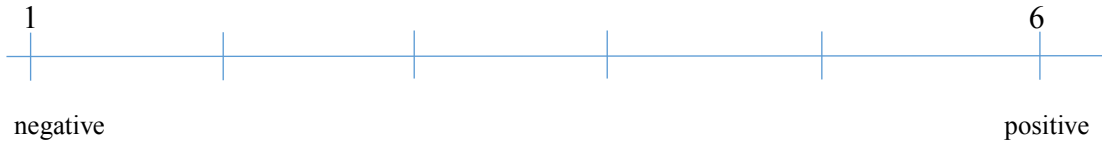

a) What are positive aspects?

---

---

---

---

b) What are negative aspects?

---

---

---

---

17. How does the cat influence your stay at the clinic?

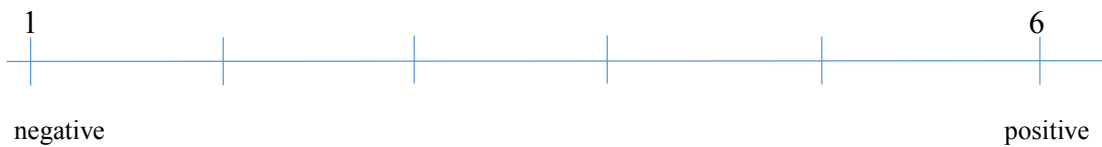

18. How does the cat influence your emotional well-being?

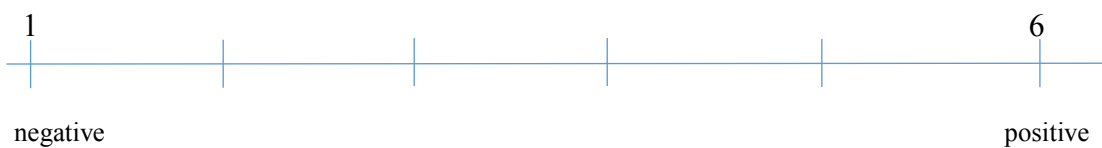

19. Does the cat help you to feel more comfortable on your ward?

- ☐ Yes
- ☐ No

20. How would the ward atmosphere change if the ward cat was no longer there?

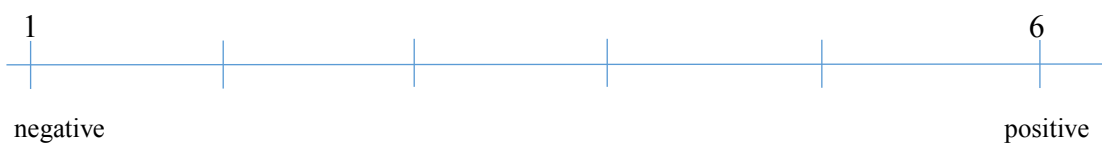

21. Does the ward cat lead to more conversation between you and other inpatients?

- ☐ Yes
- ☐ No



22. Would you prefer it the cat would not be living on your ward any more?

- ☐ Yes
- ☐ No

a) Why?

---

23. Would you prefer another animal?

- ☐ Yes
- ☐ No

a) If yes, what animal:

---

24. Did you grow up with animals?

- ☐ Yes
- ☐ No

25. Did you have pets?

- ☐ Yes
- ☐ No

a) If yes, what kind of pets:

---

26. Do you have pets at the moment?

- ☐ Ja
- ☐ Nein

a) If yes, what kind of pets:

---

27. How were your experiences with pets?

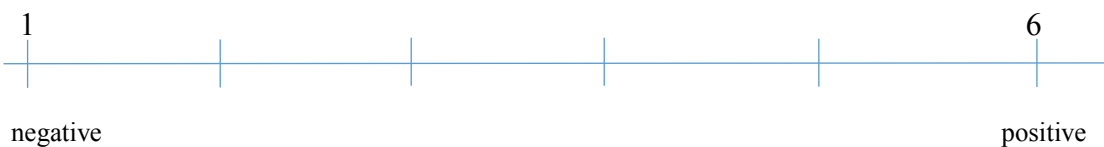

28. Do you like animals?

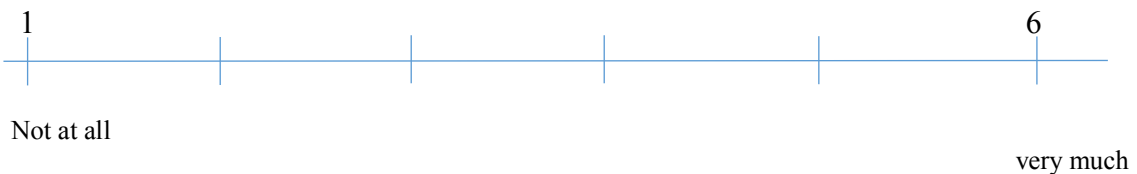

29. Do you like cats?

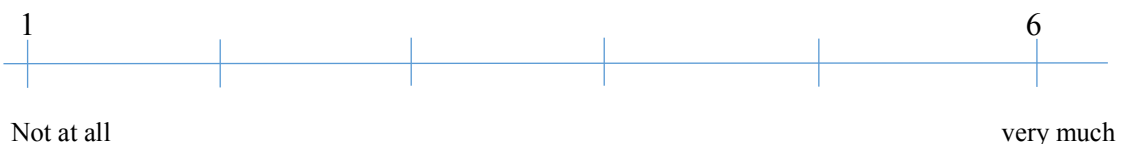



30. Do you have a cathair allergy?

- ☐ Yes
- ☐ No

31. Comments:

---

---

---

---

---

---



## Staff on Wards with Cats

Date: \_\_\_\_\_

Ward: \_\_\_\_\_

Code: \_\_\_\_\_

32. Gender

- ☐ Male
- ☐ Female

33. How long have you been working on this ward?

\_\_\_\_\_

34. Are you satisfied with your ward?

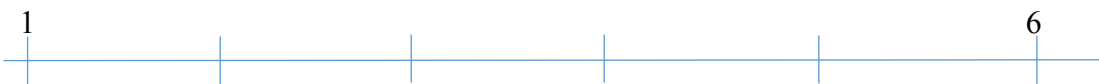

Not at all  
satisfied

very satisfied

35. What is important to you regarding ward atmosphere?

\_\_\_\_\_  
\_\_\_\_\_  
\_\_\_\_\_  
\_\_\_\_\_

36. Do you know that there is a cat living on your ward?

- ☐ Yes
- ☐ No

37. How often do you see the cat?

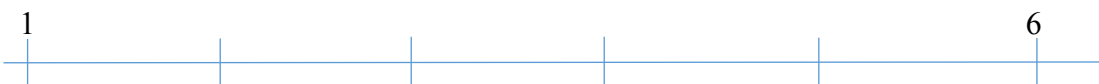

Never

very often

38. Is the cat trustful?

- ☐ Yes
- ☐ No

39. How close is your contact to the cat?



1 6

---

Not at all close very close

40. How is your emotional relation to the cat?

1 6

---

negative positive

41. How much time do you spend with the cat daily?

1 6

---

Not at all much very much

42. Does the ward cat lead to an additional effort for staff members?

- ☐ Yes
- ☐ No

43. Who takes care of the cat?

- ☐ Staff member
- ☐ Patient

44. How do you feel about that there is a cat living on your ward?

1 6

---

negative positive

a) What are positive aspects?

---

---

---

---

---

b) What are negative aspects?

---

---

---

---

---

45. How does the ward cat influence your work satisfaction?



1 6

negative positive

46. How does the ward cat influence ward atmosphere?

1 6

negative positive

47. How would the ward atmosphere change if the cat would not be living on the ward anymore?

1 6

negative positive

48. Do you believe that the ward cat helps inpatients to feel more comfortable on the ward?

- ☐ Yes
- ☐ No

49. Do you believe that the ward cat helps to make the ward more cozy?

- ☐ Yes
- ☐ No

50. How does the ward cat influence inpatients well-being?

1 6

negative positive

51. Does the ward cat lead to more conversation between inpatients?

- ☐ Yes
- ☐ No

52. Does the ward cat lead to more conversation between inpatients and staff members?

- ☐ Yes
- ☐ No

53. Would you prefer if the ward cat would not be living on your ward anymore?

- ☐ Yes
- ☐ No

a) If yes, why:

---

54. Would you prefer another animal?

- ☐ Yes



- ☐ No

a) If yes, what kind of animal:

---

55. Did you grow up with animals?

- ☐ Yes  
☐ No

56. Did you have pets?

- ☐ Yes  
☐ No

a) If yes, what kind of pets:

---

57. Do you have pets at the moment?

- ☐ Yes  
☐ No

a) If yes, what kind of pets:

---

58. Did you have positive experiences with pets?

- ☐ Yes  
☐ No

59. Do you like animals?

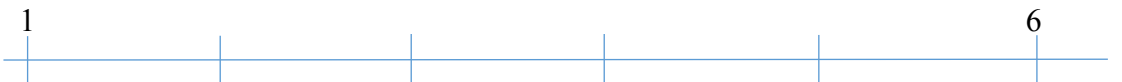

Not at all

very much

60. Do you like cats?

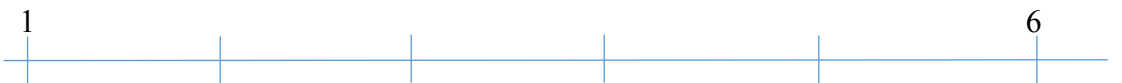

Not at all

very much

61. Do you have a cat hair allergy?

- ☐ Yes  
☐ No

62. Comments:

---

---

---

---

---



## Inpatients on Wards without Cats

Date: \_\_\_\_\_

Ward: \_\_\_\_\_

Patientcode: \_\_\_\_\_

63. Gender:

- ☐ Male
- ☐ Female

64. How long have you been on this ward?

\_\_\_\_\_

65. Did the hospitalization happen on your own request?

- ☐ Yes
- ☐ No

66. How often do you spend percentage-wise in the following areas during your therapy-free period? (Distribute 100% to the following three areas).

- ☐ In your room
- ☐ On the ward
- ☐ Outside the ward

67. What do you do in your spare time when you don't have therapy?

\_\_\_\_\_  
\_\_\_\_\_  
\_\_\_\_\_  
\_\_\_\_\_  
\_\_\_\_\_

68. What are positive aspects of your ward?

\_\_\_\_\_  
\_\_\_\_\_  
\_\_\_\_\_  
\_\_\_\_\_  
\_\_\_\_\_

69. What is important to you regarding ward atmosphere?

\_\_\_\_\_  
\_\_\_\_\_  
\_\_\_\_\_  
\_\_\_\_\_  
\_\_\_\_\_



70. How satisfied are you with your ward?

1 6

Not at all satisfied Very satisfied

71. Do you know that some wards are housing cats?

- ☐ Yes
- ☐ No

72. How do you feel about that some wards are housing a cat?

1 6

negative positive

c) What do you think are positive aspects of housing a cat on a ward?

---

---

---

---

---

d) What do you think are negative aspects of housing a cat on a ward?

---

---

---

---

---

73. How could a ward cat influence the ward atmosphere?

1 6

negative positive

74. How could a ward cat influence your satisfaction with the ward?

1 6

negative positive

75. Do you think that a ward cat could help you to feel more comfortable on your ward?

1 6

Not at all very



76. Would you prefer to have a cat on your ward?

- ☐ Yes
- ☐ No

a) Why?

---

77. Would you prefer another ward animal than a cat?

- ☐ Yes
- ☐ No

a) If yes, which:

---

78. Did you grow up with animals?

- ☐ Yes
- ☐ No

79. Did you have pets?

- ☐ Yes
- ☐ No

a) If yes, what kind of pets:

---

80. Do you have pets at the moment?

- ☐ Yes
- ☐ No

a) If yes, what kind of pets:

---

81. How were your experiences with pets?

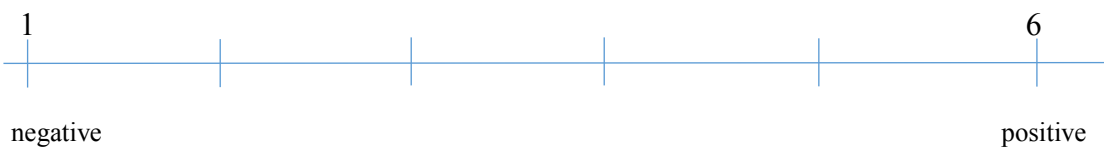

82. Do you like animals?

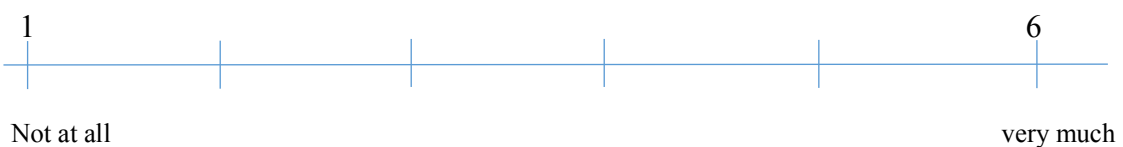



83. Do you like cats?

1 6

Not at all very much

84. Do you have a cathair allergy?

- ☐ Yes
- ☐ No

85. Comments:

---

---

---

---

---
